# Supplementary material for: Hierarchy of Evidence Within the Medical Literature
Source: Oxford University Press journal article supplement (doi:10.1542/hpeds.2022-006690), 2022-07-28
Supplement: hpeds.2022-006690supplementarydata.pdf [file hpeds.2022-006690supplementarydata.pdf]

## Supplemental Information

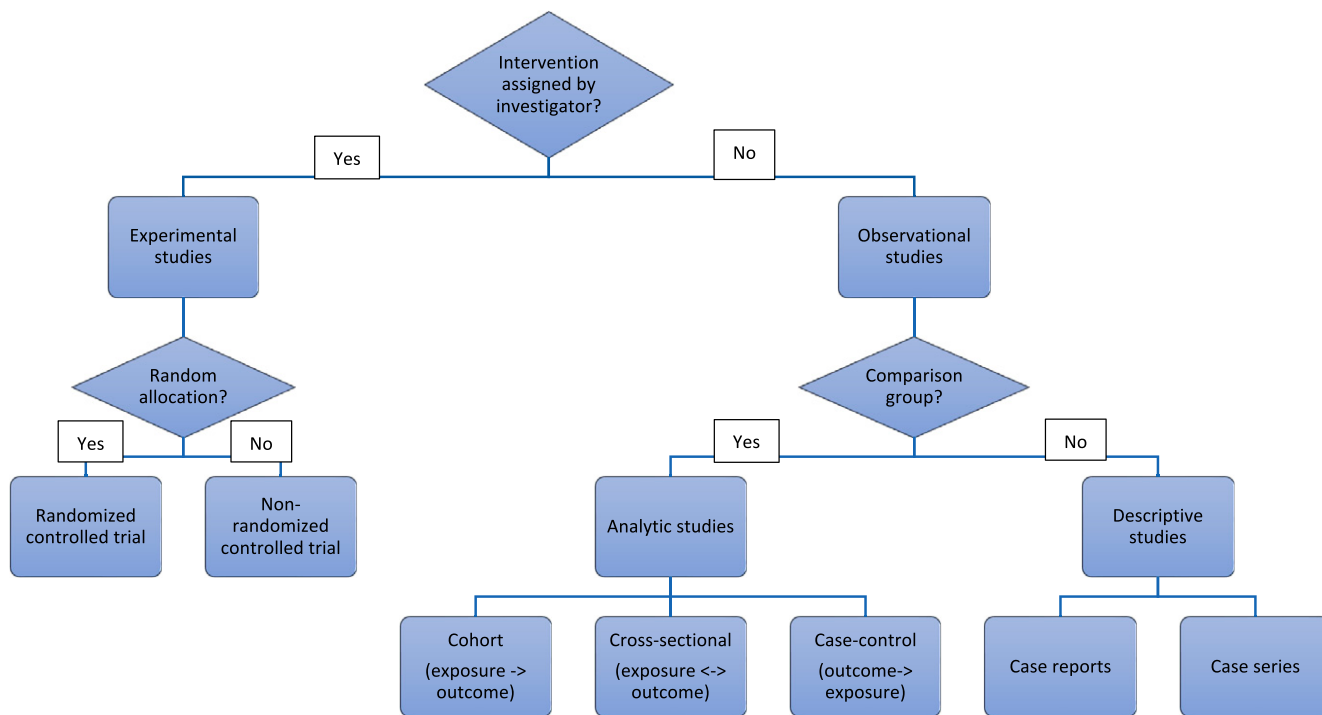

**SUPPLEMENTAL FIGURE 1** Organizational chart of quantitative study designs in clinical research.
